# Supplementary material
Source: Springer Nature journal article supplement (https://www.springermedizin.de/resource/supplementary/12889_2014_7390_MOESM1_ESM.pdf/9497306)

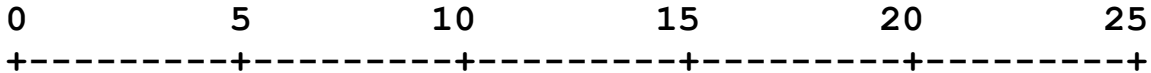

**E**  
**F**  
**P**  
**C**  
**S**  
**F**

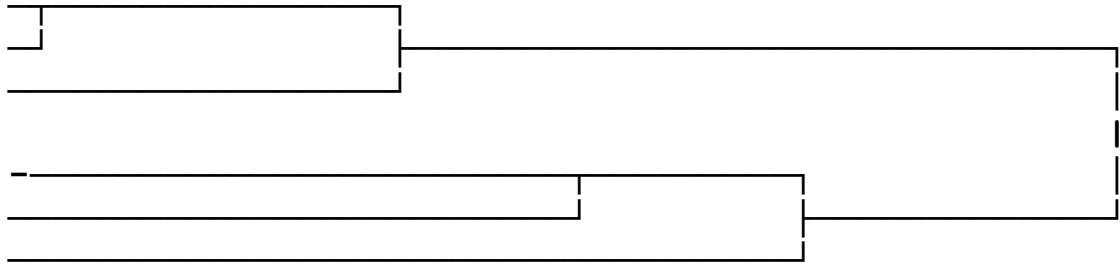

Supplement: MOESM1 [file 9497306]
